# Supplementary material for: Causal reasoning over knowledge graphs leveraging drug-perturbed and disease-specific transcriptomic signatures for drug discovery
Source: PLoS Comput Biol. 2022 Feb 25;18(2):e1009909. doi: 10.1371/journal.pcbi.1009909 (PMC8906585; doi:10.1371/journal.pcbi.1009909)
Supplement: S2 Table — (XLSX) [file pcbi.1009909.s005.xlsx]

## Sheet: Sheet1
Network	Drug-Disease Dataset Combination	% of drug-disease pairs with a path length of 3 (drug-protein-disease)	% of drug-disease pairs connected by a path	% pairs with concordant paths after applying Step 2 of the algorithm
OpenBioLink KG	L1000-GEO	2.75	70.8	0.37
	L1000-Open Targets	2.79	53.44	0.61
	CREEDS-Open Targets	12.19	61.47	0.58
	CREEDS-GEO	10.32	81.94	0.79
Custom KG	L1000-GEO	0.8	87.28	0.1
	L1000-Open Targets	0.93	86.65	0.06
	CREEDS-Open Targets	0.68	91.45	0.09
	CREEDS-GEO	1.37	92.55	0.42
